# Supplementary material for: Shell decoration of hydrothermally obtained colloidal carbon spheres with base metal nanoparticles
Source: Royal Society of Chemistry journal article supplement (doi:10.1039/c5nj00804b), 2015-01-01
Supplement: c5nj00804b1.pdf [file c5nj00804b1.pdf]

## Electronic Supplementary Information

### New Journal of Chemistry

# Shell Decoration of Hydrothermally Obtained Colloidal Carbon Spheres with Base Metal Nanoparticles

Jacco Hoekstra,<sup>a</sup> Andrew M. Beale,<sup>b,c,d</sup> Fouad Soulimani,<sup>b</sup> Marjan Versluijs-Helder,<sup>b</sup> John W. Geus,<sup>a</sup> Leonardus W. Jenneskens<sup>a</sup>

<sup>a</sup> Organic Chemistry and Catalysis, Debye Institute for Nanomaterials Science, Utrecht University, Universiteitsweg 99, 3584 CA Utrecht, the Netherlands

<sup>b</sup> Inorganic Chemistry and Catalysis, Debye Institute for Nanomaterials Science, Utrecht University, Universiteitsweg 99, 3584 CA Utrecht, the Netherlands

<sup>c</sup> UK Catalysis Hub, Research Complex at Harwell, Rutherford Appleton laboratory, Harwell, Didcot, Oxfordshire, OX11 0FA, UK

<sup>d</sup> Department of Chemistry, University College London, 20 Gordon Street, London WC1H, 0AJ, UK

## Contents

**Fig. S1.** FT-IR spectrum of the CCS after work-up.

**Fig. S2.** Ellingham diagrams of the carbothermal reduction of the base metal oxides: copper (a), nickel (b), cobalt (c) and iron (d).

**Fig. S3.** The original CCS (left) and the CCS after pyrolysis at  $T = 800\text{ }^{\circ}\text{C}$  (right) in a biphasic system of water/hexane.

**Fig S4.** Deconvolution results of the first-order (a) and second-order (b) Raman spectrum of the CCS after pyrolysis at  $T = 800\text{ }^{\circ}\text{C}$  (\* =  $\text{N}_2$ ).

**Fig. S5.** TGA (air) of CCS-supported base metal nanoparticles after pyrolysis at  $T = 800\text{ }^{\circ}\text{C}$ .

**Fig. S6.** Raman spectra of the CCS loaded with copper (a), nickel (b) and cobalt (c) after pyrolysis at  $T = 800\text{ }^{\circ}\text{C}$  (\* =  $\text{N}_2$ ).

**Table S1.** Elemental analysis and atomic ratios of sucrose and CCS samples.

**Table S2.** Deconvolution results of the Raman spectra of the CCS samples loaded with base metal nanoparticles after pyrolysis at  $T = 800\text{ }^{\circ}\text{C}$ .

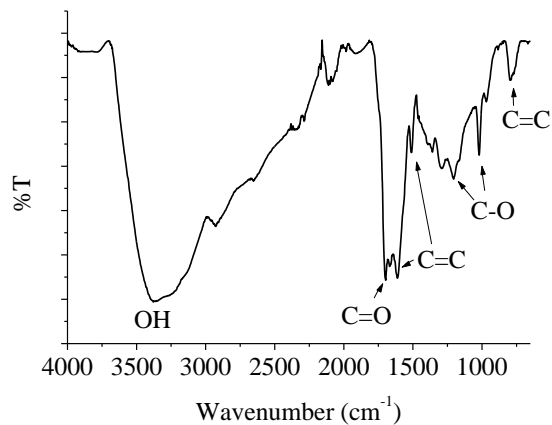

**Fig. S1.** FT-IR spectrum of the CCS after work-up.

The FT-IR spectrum resembles that of the FT-IR spectrum obtained from the HTC of glucose (see ref. 3). Various hydrophilic oxygen containing functional groups are indicated in the FT-IR spectrum.

The FT-IR spectrum shows O-H stretch vibrations ( $3340\text{ cm}^{-1}$ ), carbonyl stretch vibrations ( $1700\text{ cm}^{-1}$ ), C-O stretch vibrations ( $1204\text{ cm}^{-1}$  and  $1020\text{ cm}^{-1}$ ), C=C stretch vibrations at  $1611\text{ cm}^{-1}$ ,  $1509\text{ cm}^{-1}$  and  $789\text{ cm}^{-1}$  (aromatic core).<sup>63</sup>

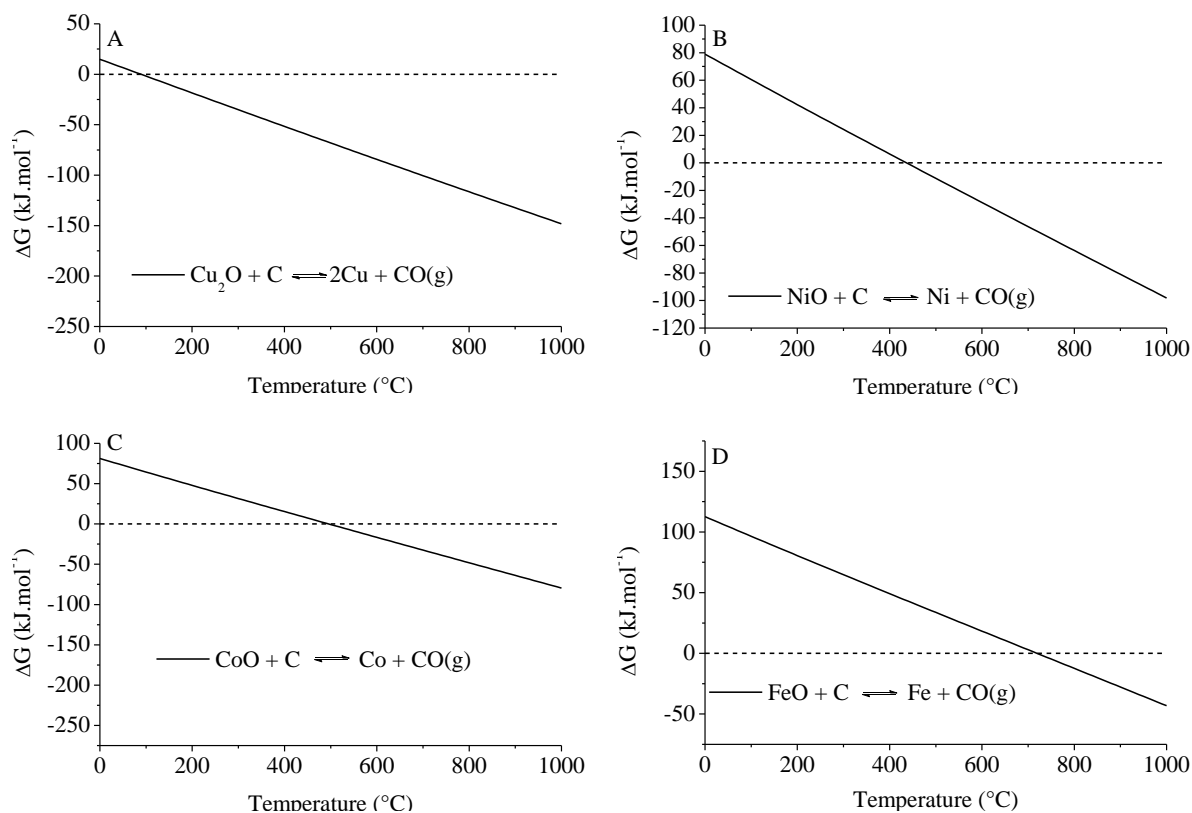

**Fig. S2.** Ellingham diagrams of the carbothermal reduction of the base metal oxides: copper (a), nickel (b), cobalt (c) and iron (d).

In previous work from the pyrolysis of microcrystalline cellulose spheres loaded with base metal salts<sup>27</sup> we found that pyrolysis of these loaded bodies resulted in the formation of amorphous carbonaceous bodies with base metal oxide nanoparticles dispersed in them. At increasing temperature the base metal oxide nanoparticles reduced stepwise, *i.e.*  $\text{CuO} \rightarrow \text{Cu}_2\text{O} \rightarrow \text{Cu}$ ,  $\text{NiO} \rightarrow \text{Ni}$ ,  $\text{Co}_3\text{O}_4 \rightarrow \text{CoO} \rightarrow \text{Co}$  and  $\text{Fe}_3\text{O}_4 \rightarrow \text{FeO} \rightarrow \text{Fe}$ . The final reduction steps are displayed in the Ellingham diagrams, taking into account the Boudouard equilibrium ( $\text{C} + \text{CO}_2 \rightleftharpoons 2\text{CO}$ ), which lies at the CO side at elevated temperatures ( $T > 700 \text{ }^\circ\text{C}$ ).<sup>40,41</sup> The Ellingham diagrams show that carbothermal reduction of the respective base metal oxides is feasible at the temperature of pyrolysis employed ( $T = 800 \text{ }^\circ\text{C}$ ).

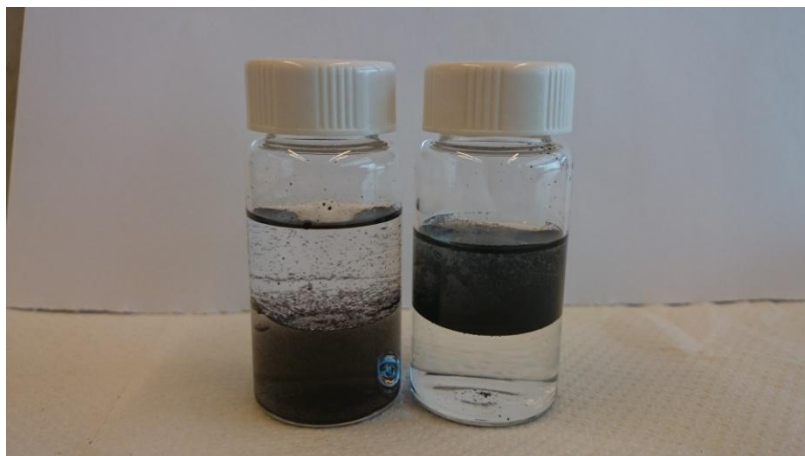

**Fig. S3.** The original CCS (left) and the CCS after pyrolysis at  $T = 800\text{ }^{\circ}\text{C}$  (right) in a biphasic system of water/hexane.

The original CCS are hydrophilic due to the oxygen-containing functionalities on their surface. Therefore in a water/hexane biphasic system the CCS are distributed in the aqueous phase. Due to the pyrolysis the carbonaceous material becomes hydrophobic and ends up in the hexane layer.

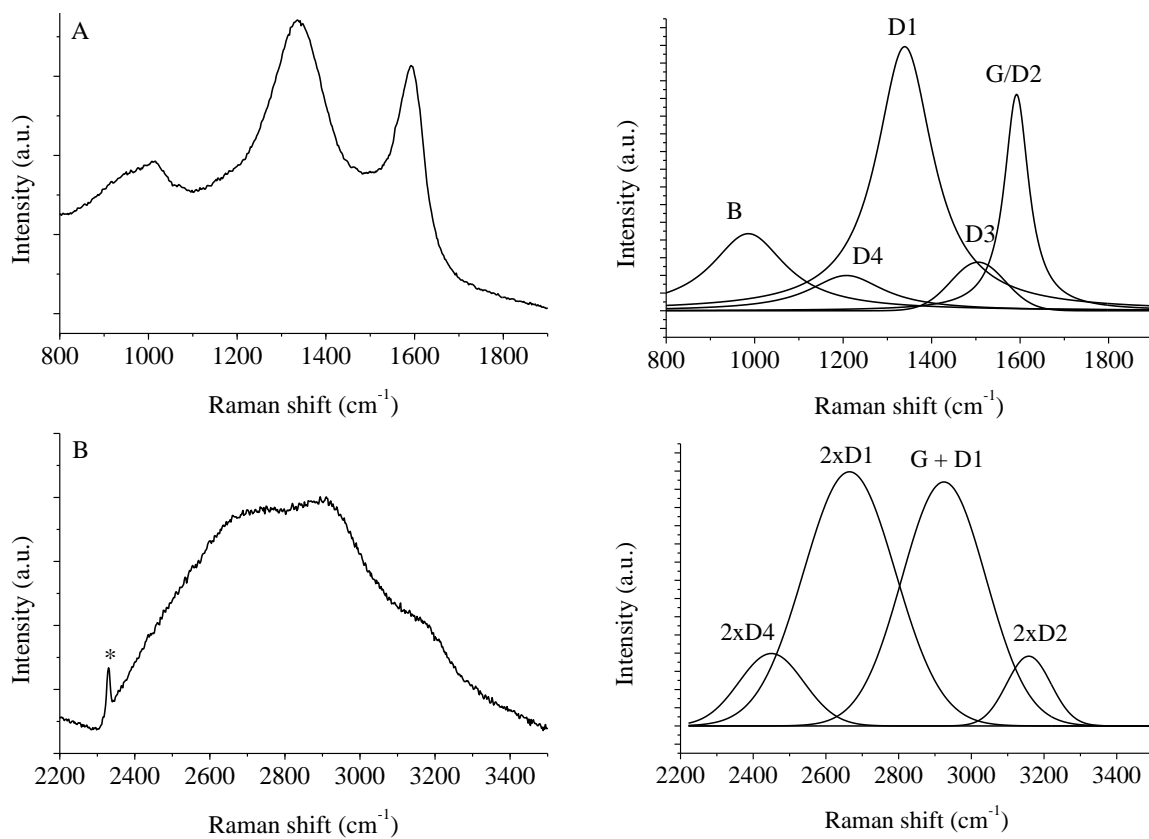

**Fig. S4.** Deconvolution results of the first-order (a) and second-order (b) Raman spectrum of the CCS after pyrolysis at  $T = 800\text{ }^{\circ}\text{C}$  (\* =  $\text{N}_2$ ). Note the additional background peak around  $1000\text{ cm}^{-1}$ , which represents an artefact of the experimental setup. It was taken into consideration with the deconvolution procedure, denoted as B (Table S2).

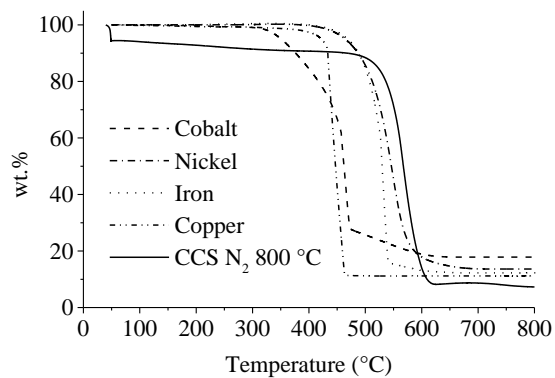

**Fig. S5.** TGA (air) of CCS-supported base metal nanoparticles after pyrolysis at T = 800 °C.

The ash residue of the CCS after pyrolysis in air (T = 800 °C.) was 7.2 wt.%. It was anticipated that the base metals were converted to their most stable oxidic forms, *viz.*, CuO, NiO, Co<sub>3</sub>O<sub>4</sub> and Fe<sub>3</sub>O<sub>4</sub>. The base metal loading, after correction for the ash residue, were calculated accordingly: Cu 3.5 wt.%, Ni 5.1 wt.%, Co 1.5 wt.% and Fe 1.2 wt.%.

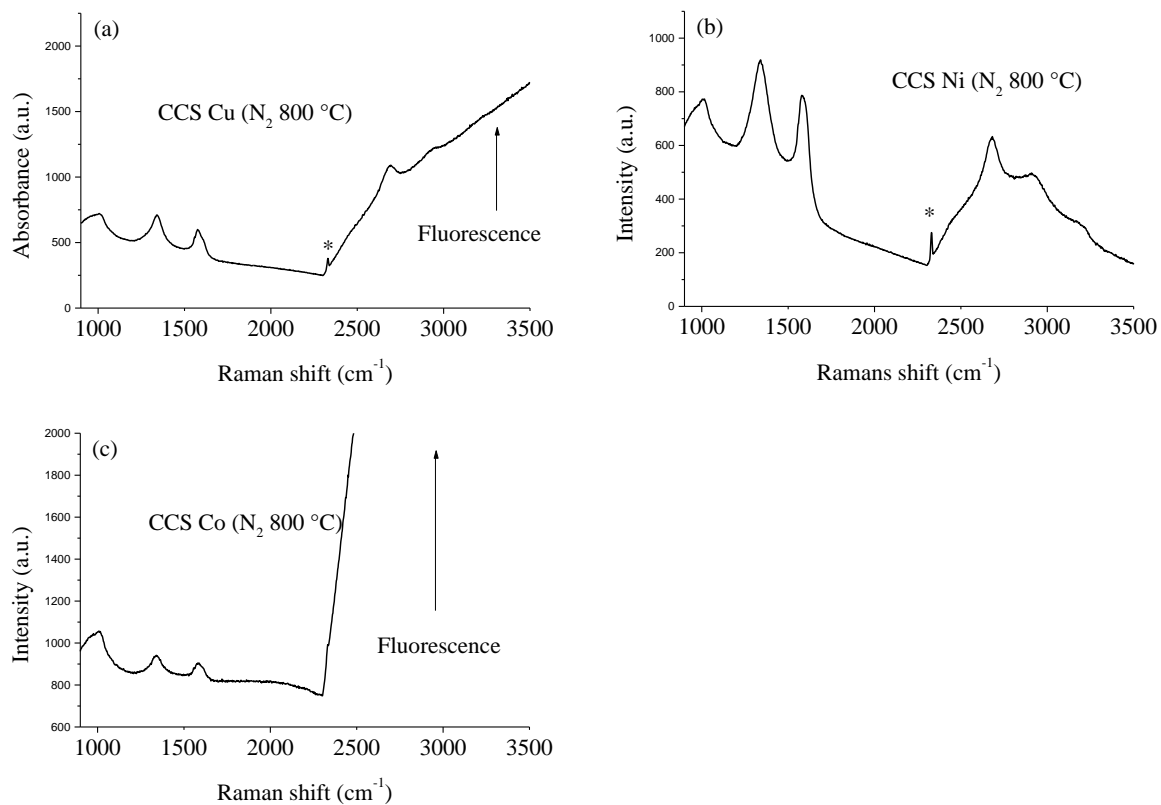

**Fig. S6.** Raman spectra of the CCS loaded with copper (a), nickel (b) and cobalt (c) after pyrolysis at  $T = 800\text{ }^{\circ}\text{C}$  (\* = N<sub>2</sub>). Due to the occurrence of fluorescence the 2<sup>nd</sup>-order part of the Raman spectrum of the sample containing cobalt obtained after pyrolysis at  $T = 800\text{ }^{\circ}\text{C}$  could not be deconvoluted (See also Table S2).



**Table S1.** Elemental analysis and atomic ratios of sucrose and CCS samples.

| Sample                    | C<br>(wt.%) | H<br>(wt.%) | O<br>(wt.%) | H/C  | O/C  |
|---------------------------|-------------|-------------|-------------|------|------|
| Sucrose                   | 42.11       | 6.43        | 51.46       | 1.83 | 0.92 |
| CCS                       | 59.55       | 5.98        | 33.21       | 1.20 | 0.42 |
| CCS N <sub>2</sub> 800 °C | 82.74       | 5.34        | 10.21       | 0.77 | 0.10 |

Elemental analysis shows an increase in the amount of carbon at the expense of hydrogen and oxygen when the sucrose is hydrothermally treated. The oxygen content is still reasonably high, which confirms that oxygen functionalities are present (*cf.* also Figure S1).

After pyrolysis at T = 800 °C of the CCS elemental analysis shows that the wt.% of carbon increases with respect to wt.% of hydrogen and, particularly, wt.% of oxygen; organic functional groups are lost. Notwithstanding, a significant amount of oxygen remains incorporated even after treatment at T = 800 °C.<sup>42,43</sup> This indicates, that primarily the oxygen functionalities of the shell, *viz.* near the perimeter, are lost while the more stable bridged oxygen functionalities of the furan derivatives in the original core survive.

**Table S2.** Deconvolution results of the Raman spectra of the CCS samples loaded with base metal nanoparticles after pyrolysis at T = 800 °C.

| Sample                              | Position (cm <sup>-1</sup> ) | FWHM (cm <sup>-1</sup> ) |
|-------------------------------------|------------------------------|--------------------------|
| <b>CCS, N<sub>2</sub> 800 °C</b>    |                              |                          |
| B                                   | 986                          | 204                      |
| D4                                  | 1208                         | 206                      |
| D1                                  | 1340                         | 156                      |
| D3                                  | 1506                         | 144                      |
| G/D2                                | 1592                         | 66                       |
| 2×D4                                | 2450                         | 210                      |
| 2×D1                                | 2664                         | 296                      |
| G+D1                                | 2924                         | 272                      |
| 2×D2                                | 3158                         | 142                      |
| <b>CCS, Cu N<sub>2</sub> 800 °C</b> |                              |                          |
| B                                   | 984                          | 192                      |
| D4                                  | 1208                         | 200                      |
| D1                                  | 1340                         | 154                      |
| D3                                  | 1506                         | 148                      |
| G/D2                                | 1594                         | 64                       |
| 2×D4                                | 2450                         | 158                      |
| 2×D1                                | 2670                         | 302                      |
| G+D1                                | 2930                         | 248                      |
| 2×D2                                | 3160                         | 166                      |
| <b>CCS, Ni N<sub>2</sub> 800 °C</b> |                              |                          |
| B                                   | 994                          | 184                      |
| D4                                  | 1170                         | 202                      |
| D1                                  | 1340                         | 136                      |
| D3                                  | 1506                         | 152                      |
| G/D2                                | 1588                         | 66                       |
| 2×D4                                | 2490                         | 214                      |
| 2×D1                                | 2674                         | 172                      |
| G+D1                                | 2906                         | 292                      |
| 2×D2                                | 3168                         | 138                      |
| <b>CCS, Co N<sub>2</sub> 800 °C</b> |                              |                          |
| B                                   | 982                          | 176                      |
| D1                                  | 1340                         | 92                       |
| D3                                  | 1500                         | 222                      |
| G                                   | 1580                         | 44                       |
| D2                                  | 1610                         | 26                       |
| <b>CCS, Fe N<sub>2</sub> 800 °C</b> |                              |                          |
| B                                   | 984                          | 186                      |
| D4                                  | 1258                         | 256                      |
| D1                                  | 1342                         | 90                       |
| D3                                  | 1500                         | 174                      |
| G                                   | 1580                         | 52                       |
| D2                                  | 1610                         | 34                       |
| 2×D4                                | 2548                         | 278                      |
| 2×D1                                | 2684                         | 106                      |
| G+D1                                | 2884                         | 316                      |
| 2×D2                                | 3182                         | 150                      |
